# Supplementary material for: Beyond molecular structure: critically assessing machine learning for designing organic photovoltaic materials and devices
Source: Royal Society of Chemistry journal article supplement (doi:10.1039/d4ta01942c), 2024-01-01
Supplement: d4ta01942c1.pdf [file d4ta01942c1.pdf]

## Supplementary Information:

### **Beyond Molecular Structure: Critically Assessing Machine Learning for Designing Organic Photovoltaic Materials and Devices**

Martin Seifrid<sup>a,b†\*</sup>, Stanley Lo<sup>b,†</sup>, Dylan G. Choi<sup>c</sup>, Gary Tom<sup>b,d,e</sup>, My Linh Le<sup>f</sup>, Kunyu Li<sup>c,‡</sup>, Rahul Sankar<sup>c,‡</sup>, Hoai-Thanh Vuong<sup>c,‡</sup>, Hiba Wakidi<sup>c,‡</sup>, Ahra Yi<sup>c,‡</sup>, Ziyue Zhu<sup>c,‡</sup>, Nora Schopp<sup>c</sup>, Aaron Peng<sup>c</sup>, Benjamin R. Luginbuhl<sup>c</sup>, Thuc-Quyen Nguyen<sup>c\*</sup>, Alán Aspuru-Guzik<sup>b,d,e,g,h,i,j\*</sup>

<sup>a</sup>*Department of Materials Science and Engineering, North Carolina State University, Raleigh, North Carolina 27695, USA*

<sup>b</sup>*Department of Chemistry, Chemical Physics Theory Group, 80 St. George St., University of Toronto, Ontario M5S 3H6, Canada*

<sup>c</sup>*Department of Chemistry and Biochemistry, Center for Polymers and Organic Solids, University of California Santa Barbara, Santa Barbara, California 93106, USA*

<sup>d</sup>*Department of Computer Science, University of Toronto, 40 St George St, Toronto, ON M5S 2E4*

<sup>e</sup>*Vector Institute for Artificial Intelligence, 661 University Ave. Suite 710, Toronto, Ontario M5G 1M1, Canada*

<sup>f</sup>*Materials Department, University of California Santa Barbara, Santa Barbara, California 93106, USA*

<sup>g</sup>*Department of Chemical Engineering & Applied Chemistry, 200 College St., University of Toronto, Ontario M5S 3E5, Canada*

<sup>h</sup>*Department of Materials Science & Engineering, 184 College St., University of Toronto, Ontario M5S 3E4, Canada*

<sup>i</sup>*Lebovic Fellow, Canadian Institute for Advanced Research (CIFAR), 661 University Ave., Toronto, Ontario M5G 1M1, Canada*

<sup>j</sup>*Acceleration Consortium, University of Toronto, 80 St. George St, Toronto, ON M5S 3H6, Canada*

<sup>†,‡</sup>*Authors contributed equally*

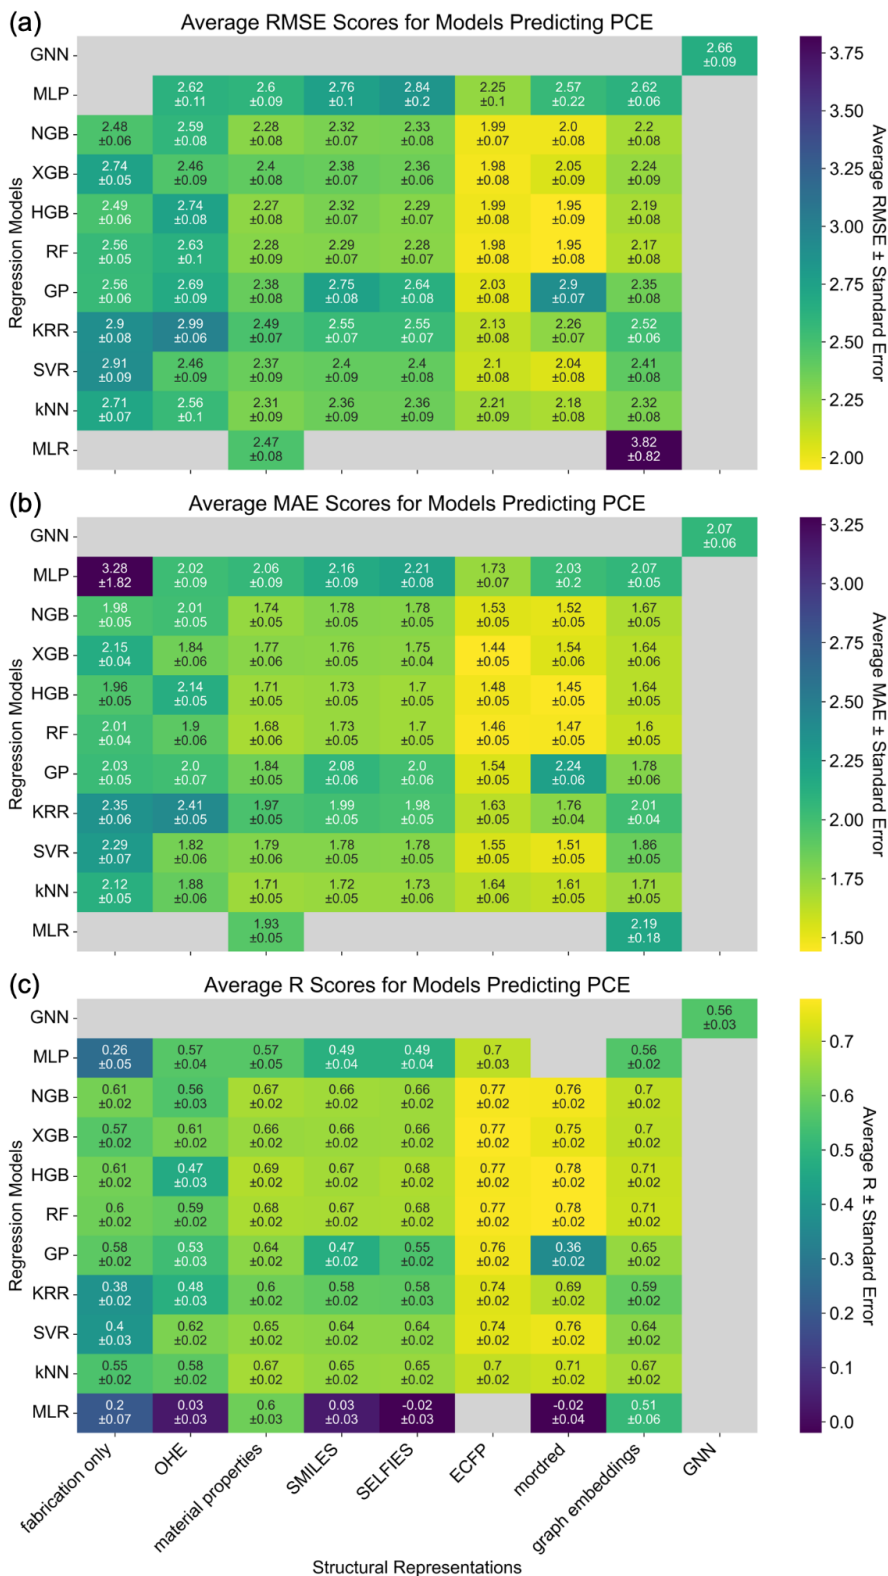

**Figure S1.** Heatmap of model performance for predicting PCE from the molecular structure of the donor and acceptor materials using various models and representations as measured by (a) RMSE, (b) MAE, and (c) R scores.

**Table S1.** Performance metrics of GNN models from which graph embeddings were extracted.

| Target                        | Score          | Donors | Acceptors |
|-------------------------------|----------------|--------|-----------|
| HOMO                          | R <sup>2</sup> | -0.09  | 0.21      |
|                               | MSE            | 1.24   | 0.46      |
| LUMO                          | R <sup>2</sup> | 0.01   | 0.54      |
|                               | MSE            | 0.70   | 0.51      |
| E <sub>g</sub> <sup>opt</sup> | R <sup>2</sup> | 0.43   | 0.68      |
|                               | MSE            | 0.49   | 0.31      |
| Best loss                     |                | 0.76   | 0.42      |

**Table S2.** Table of model performance for the PUFp representation.

| Model | R2        | RMSE      | MAE       | R         |
|-------|-----------|-----------|-----------|-----------|
| MLR   |           |           |           | 0.02±0.04 |
| kNN   | 0.43±0.03 | 2.32±0.07 | 1.76±0.06 | 0.66±0.02 |
| SVR   | 0.43±0.03 | 2.32±0.23 | 1.74±0.06 | 0.67±0.02 |
| KRR   | 0.45±0.03 | 2.29±0.06 | 1.76±0.05 | 0.68±0.02 |
| GP    | 0.35±0.03 | 2.47±0.08 | 1.87±0.06 | 0.61±0.02 |
| RF    | 0.48±0.02 | 2.22±0.07 | 1.67±0.05 | 0.70±0.02 |
| HGB   | 0.40±0.03 | 2.37±0.06 | 1.85±0.05 | 0.65±0.02 |
| XGB   | 0.47±0.02 | 2.24±0.07 | 1.71±0.05 | 0.70±0.02 |
| NGB   | 0.42±0.02 | 2.35±0.07 | 1.85±0.05 | 0.66±0.02 |
| MLP   | 0.37±0.04 | 2.44±0.09 | 1.91±0.08 | 0.65±0.02 |

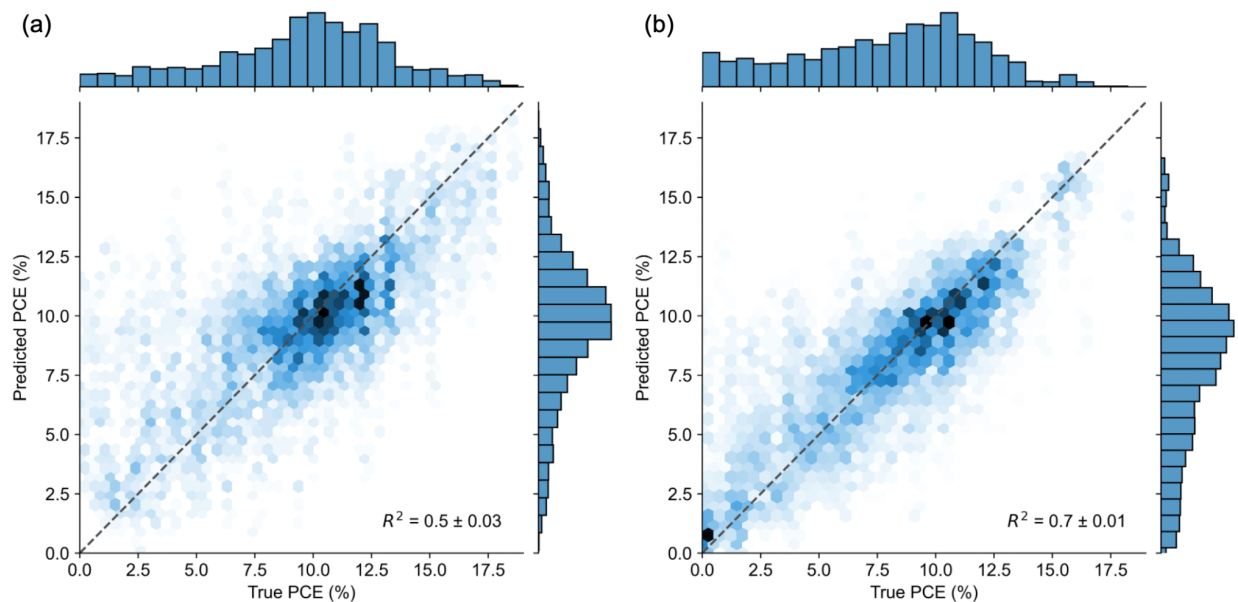

**Figure S2.** Heatmap parity plots of HGBR model predictions using 5-fold CV initialized from 7 random seeds. (a) The HGBR algorithm outperforms RF models trained on computed descriptors from the 2023 Greenstein and Hutchison dataset<sup>1</sup> (ca. 1000 unique D:A pairs) using much simpler molecular representations (ECFP and incomplete material properties). (b) The HGBR algorithm performs comparably to RF models trained on mordred descriptors and material properties from the 2021 Miyake and Saeki dataset<sup>2</sup> (ca. 1300 data points) using ECFP and material properties.

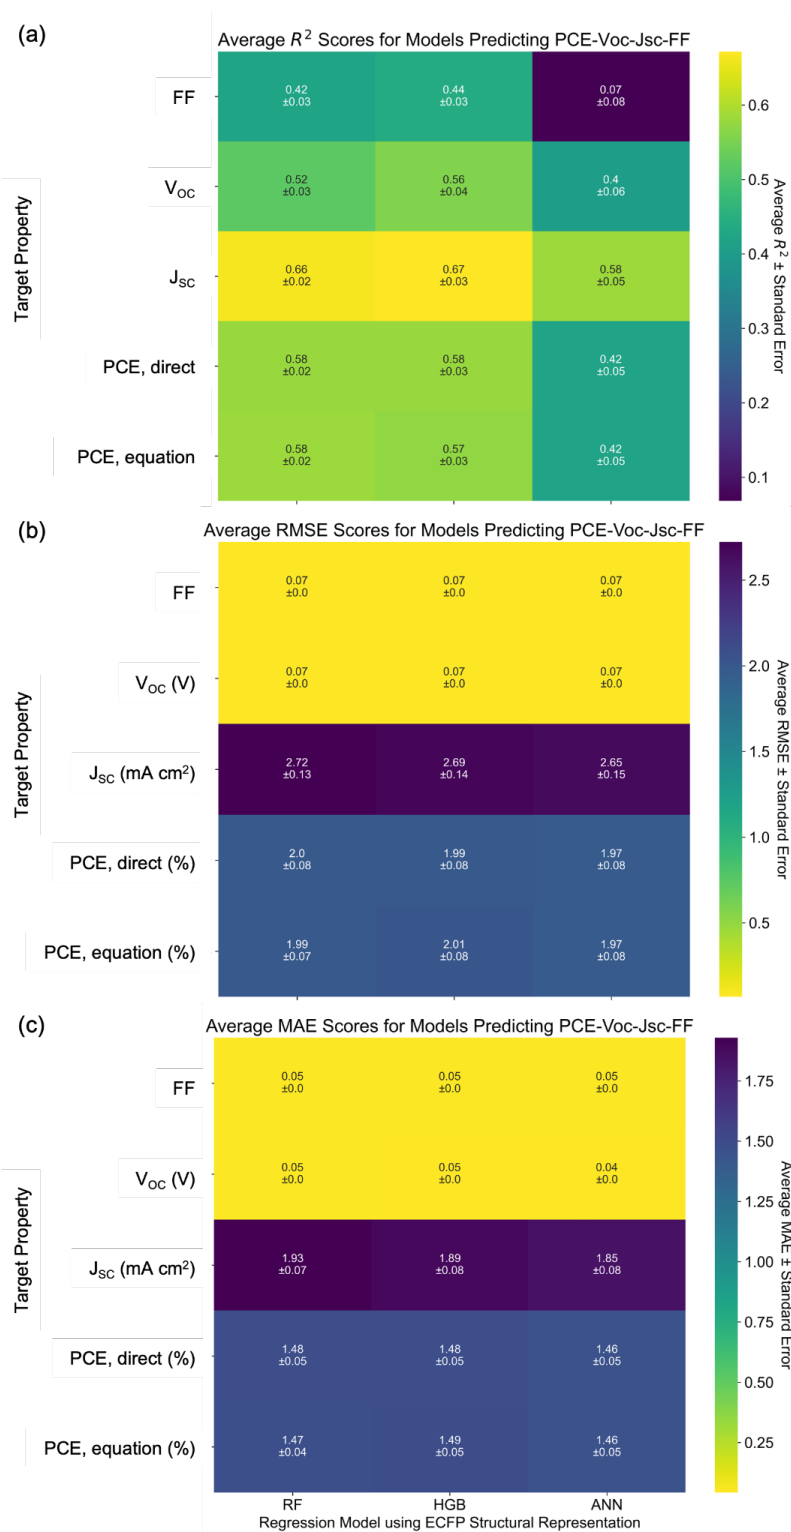

**Figure S3.** Heatmaps of performance of multi-output RF, HGB, and ANN models trained on the ECFP molecular representations for predicting FF, V<sub>oc</sub>, J<sub>sc</sub>, PCE (directly), and PCE (from Equation 1 in the main text) concurrently, as measure by (a)  $R^2$ , (b) RMSE, (c) MAE scores.

**Table S3.** Encodings of HTLs and ETLs along with their energy level, measurement method, and reference. CV: cyclic voltammetry; KP: Kelvin probe; UPS: ultraviolet photon spectroscopy; WF: work function.

| Name                          | Energy (eV) | Energy level | Measurement technique               | Reference |
|-------------------------------|-------------|--------------|-------------------------------------|-----------|
| C <sub>60</sub> -bissalt      | -3.9        | LUMO         | CV                                  | 3         |
| Ca                            | -2.9        | WF           |                                     | 4         |
| EDTA-ZnO                      | -4.05       | WF           | UPS                                 | 5         |
| FPI                           | -3.93       | LUMO         | CV                                  | 3         |
| LiF                           | -3          | WF           |                                     |           |
| Al                            | -4.3        | WF           |                                     | 6         |
| N719:PrC <sub>60</sub> MAI    | -3.9        | WF           | UPS                                 | 7         |
| PDIN                          | -3.6        |              |                                     |           |
| PDINO                         | -3.9        |              |                                     | 6         |
| PEIE                          | -4.1        | WF           |                                     | 8         |
| PFN                           | -2.14       | LUMO         | CV                                  | 9         |
| ZnO/PFN                       | -2.14       | LUMO         | CV                                  | 9         |
| PFN-Br                        | -2.18       | LUMO         | CV                                  | 10        |
| PFNDI-Br                      | -4.18       | LUMO         | CV                                  | 11        |
| PNDIT-F3N                     | -3.9        | LUMO         | CV                                  | 11        |
| PNDIT-F3N-Br                  | -4.18       | LUMO         | CV                                  | 11        |
| TiO <sub>2</sub> :TOPD        | -4.23       | WF           | KP                                  | 12        |
| ZnO                           | -4.46       | WF           |                                     | 13        |
| ZnO/PFN-Br                    | -4.08       | LUMO         | UPS + E <sub>g</sub> <sup>opt</sup> | 10        |
| ZrAcAc                        | -4.65       | WF           | UPS                                 | 14        |
| CuSCN                         | -5.3        | WF           |                                     | 15        |
| MoOx                          | -5.3        | WF           | KP                                  | 16        |
| PEDOT:PSS                     | -5.2        | WF           | UPS                                 | 13        |
| V <sub>2</sub> O <sub>5</sub> | -4.7        |              |                                     | 17        |

**Table S4.** Physicochemical descriptors of solvents and solvent additives from HSPiP.<sup>18</sup>

| <b>Abbreviation</b> | <b>Descriptor</b>                                              | <b>Units</b>       |
|---------------------|----------------------------------------------------------------|--------------------|
| dipole              | Electric dipole moment                                         | D                  |
| dD                  | Hansen solubility parameter: energy from dispersion forces     | MPa <sup>0.5</sup> |
| dP                  | Hansen solubility parameter: energy from intermolecular forces | MPa <sup>0.5</sup> |
| dH                  | Hansen solubility parameter: energy from hydrogen bonds        | MPa <sup>0.5</sup> |
| dHDon               | Hansen solubility parameter: hydrogen bonding donor term       | MPa <sup>0.5</sup> |
| dHAcc               | Hansen solubility parameter: hydrogen bonding acceptor term    | MPa <sup>0.5</sup> |
| MW                  | Molecular weight                                               |                    |
| Density             | Density at 25 °C                                               | g/cm <sup>3</sup>  |
| BPt                 | Boiling point                                                  | °C                 |
| MPt                 | Melting point                                                  | °C                 |
| logKow              | Log of octanol-water partition coefficient                     |                    |
| RI                  | Refractive index                                               |                    |
| Trouton             | Trouton's rule: (H <sub>Vap</sub> at BPt) / BPt                | J/kmol             |
| RER                 | Relative evaporation rate                                      |                    |
| ParachorGA          | Parachor for surface tension                                   |                    |
| RD                  | Molecular refractivity                                         |                    |
| DCp                 | Heat capacity at 25 °C                                         | J/kmol             |
| log n               | Log of viscosity at 25 °C                                      | mPa•s              |
| SurfTen             | Surface tension at 25 °C                                       | mN/m               |

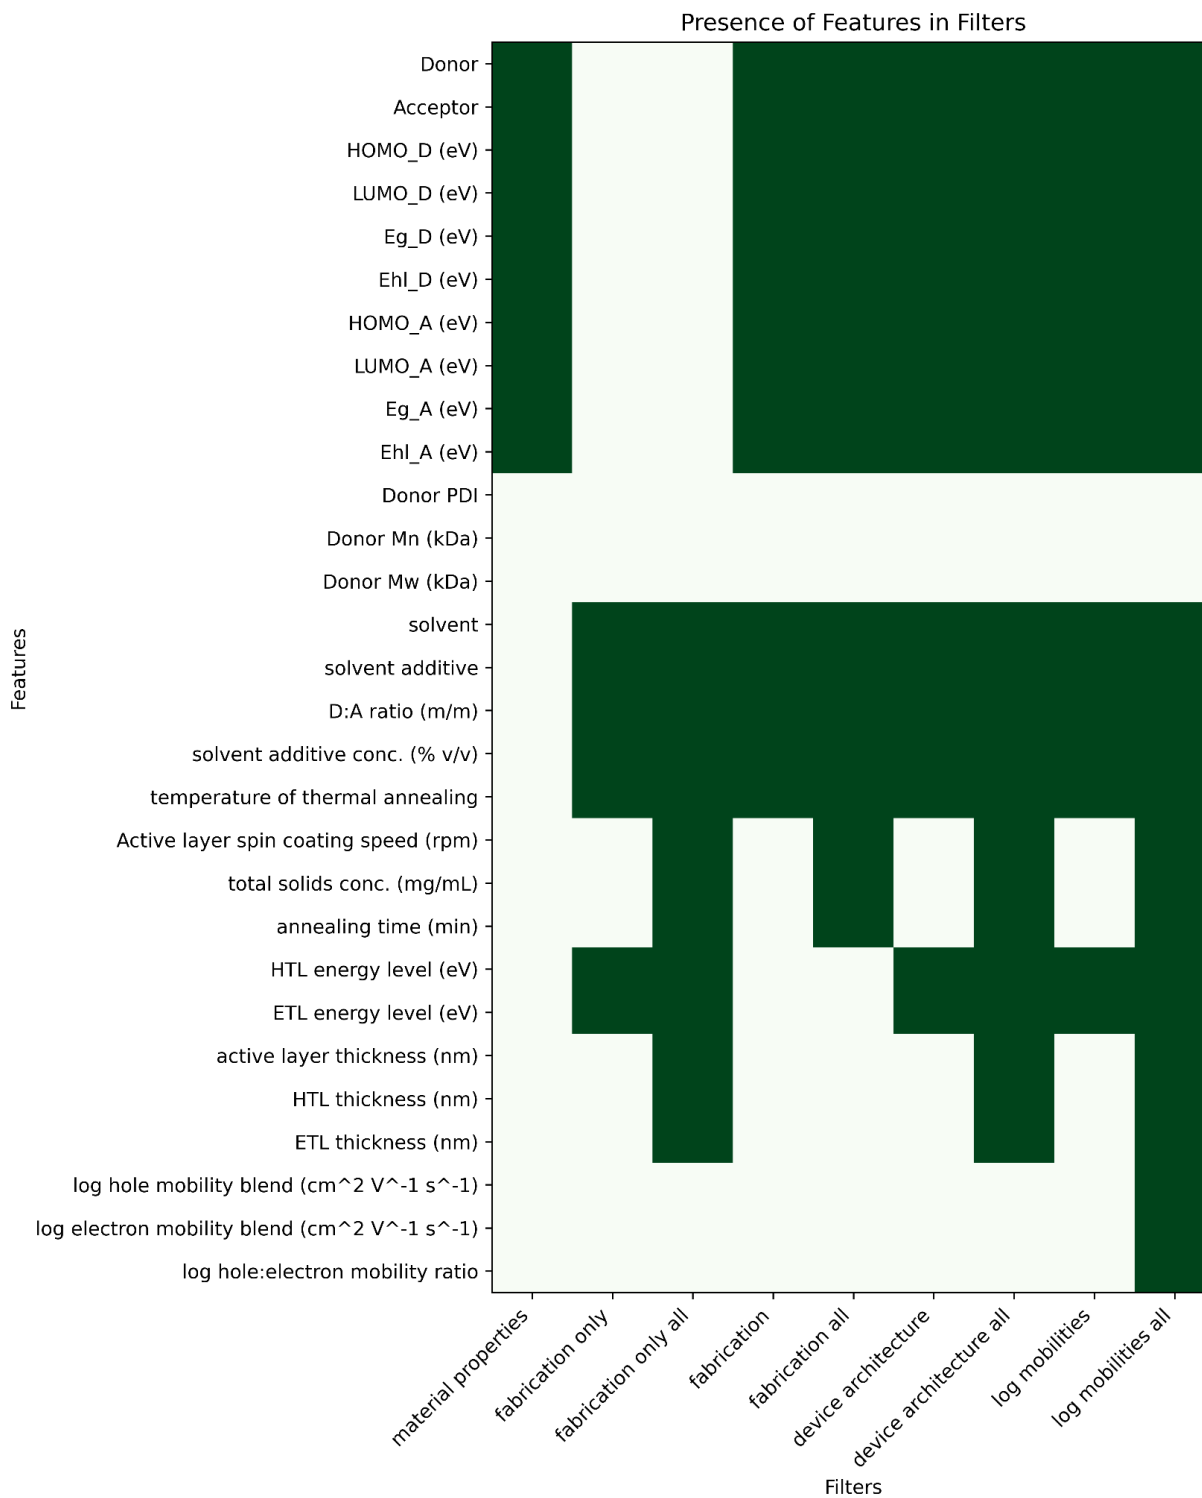

**Figure S4.** Plot of dataset features in the various filters.



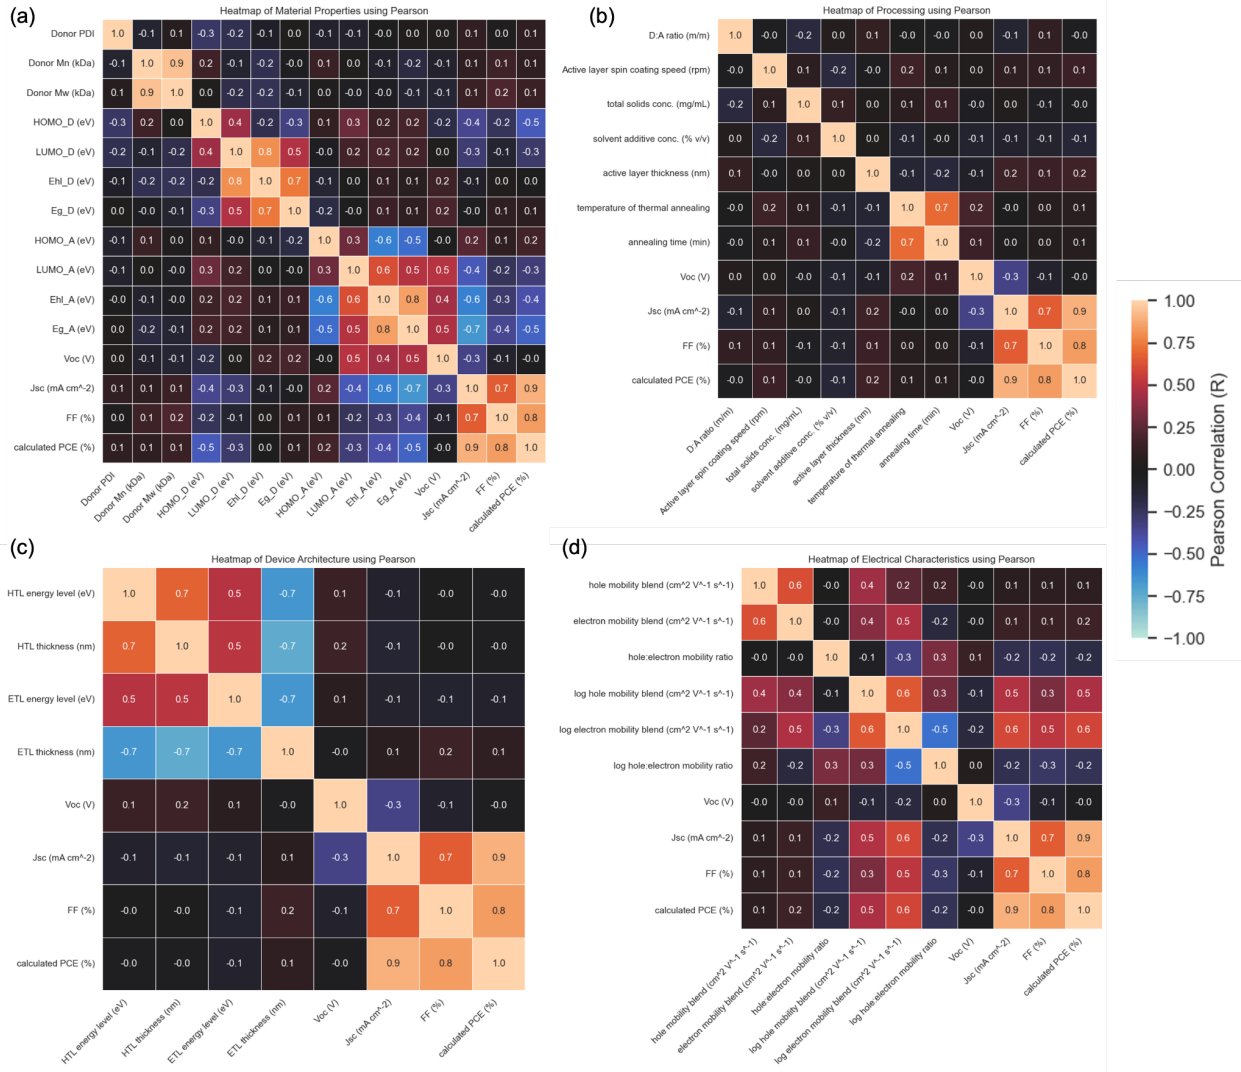

**Figure S5.** Pearson correlation coefficient heatmaps of the different groups of processing features with the output variables: (a) material properties, (b) processing, (c) device architecture, (d) charge carrier mobilities. Feature groups correspond to those defined in Figure S4. Correlation coefficient values in each cell are rounded to the nearest tenth for readability.

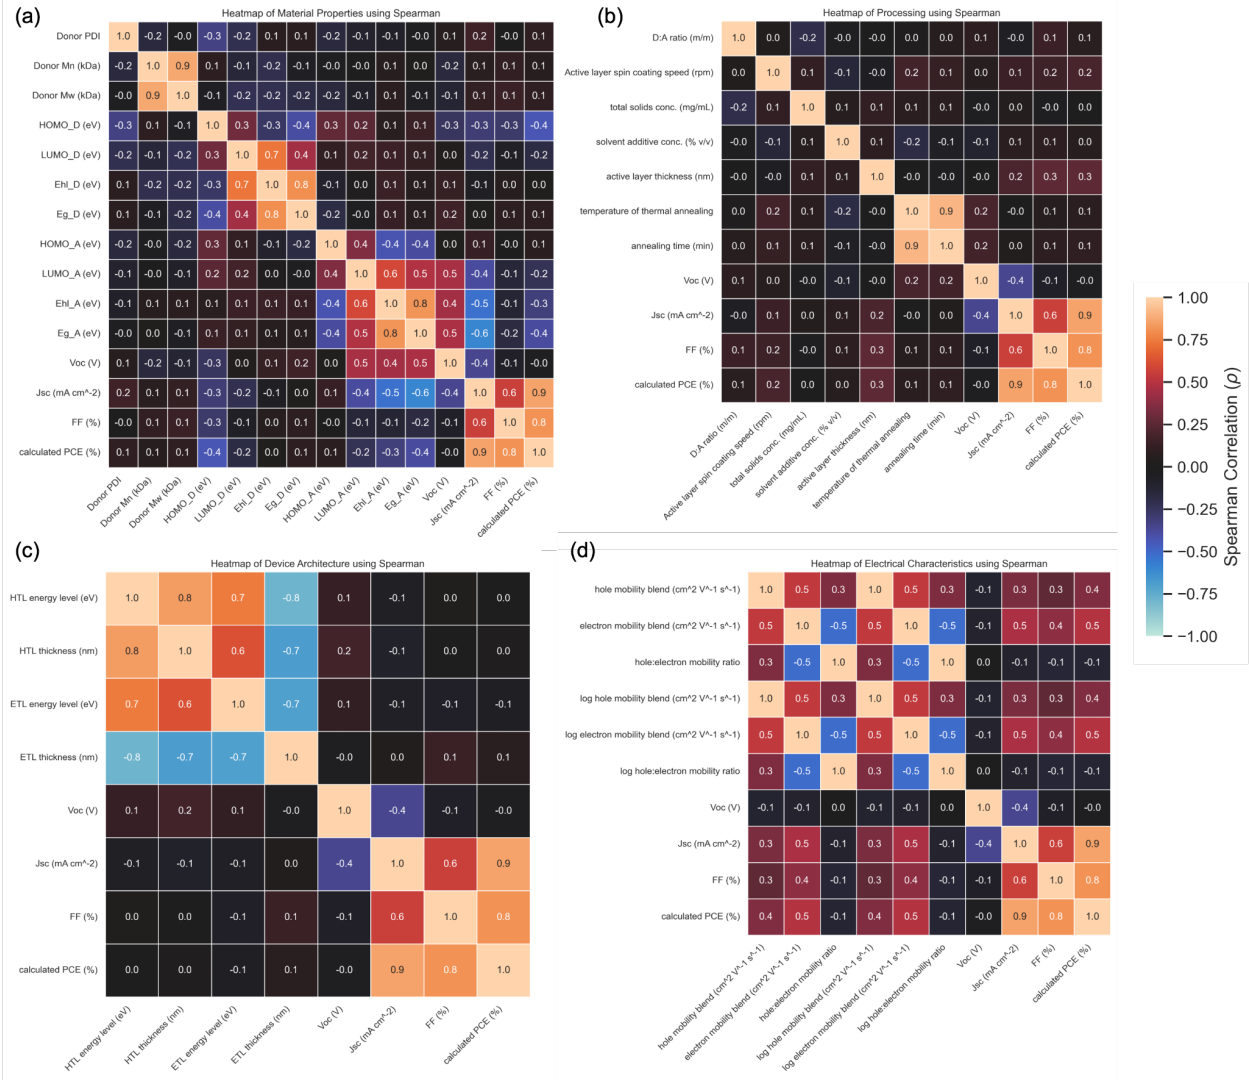

**Figure S6.** Spearman correlation coefficient heatmaps of the different groups of processing features with the output variables: (a) material properties, (b) processing, (c) device architecture, (d) charge carrier mobilities. Feature groups correspond to those defined in Figure S4. Correlation coefficient values in each cell are rounded to the nearest tenth for readability.

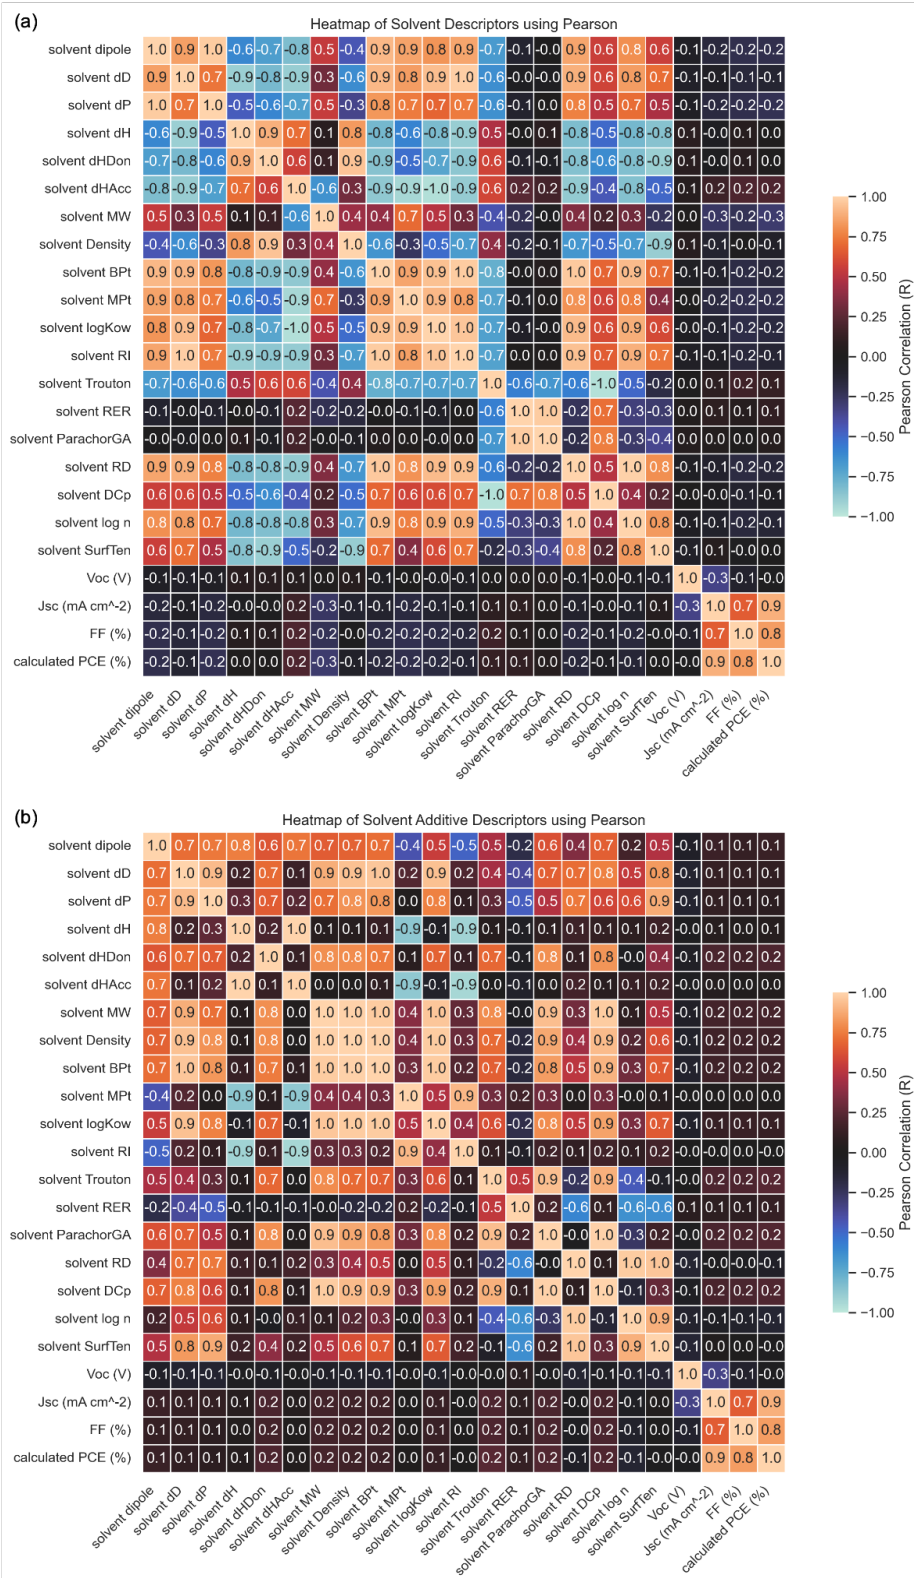

**Figure S7.** Pearson correlation coefficient heatmaps of (a) solvent and (b) solvent additive descriptors with the output variables. Correlation coefficient values in each cell are rounded to the nearest tenth for readability.

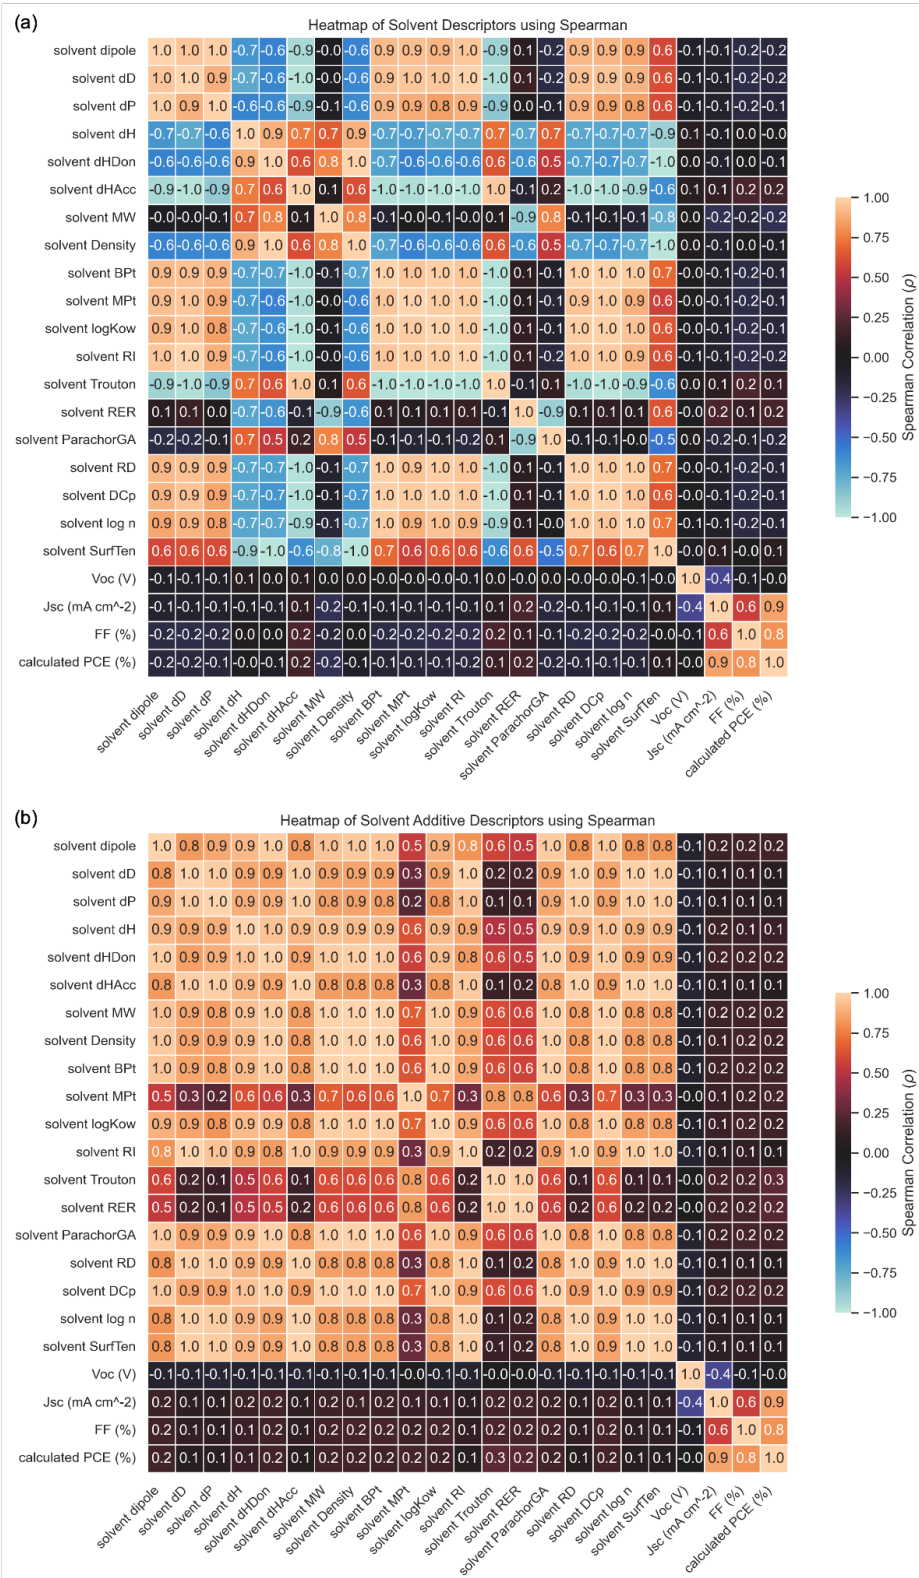

**Figure S8.** Spearman correlation coefficient heatmaps of (a) solvent and (b) solvent additive descriptors with the output variables. Correlation coefficient values in each cell are rounded to the nearest tenth for readability.



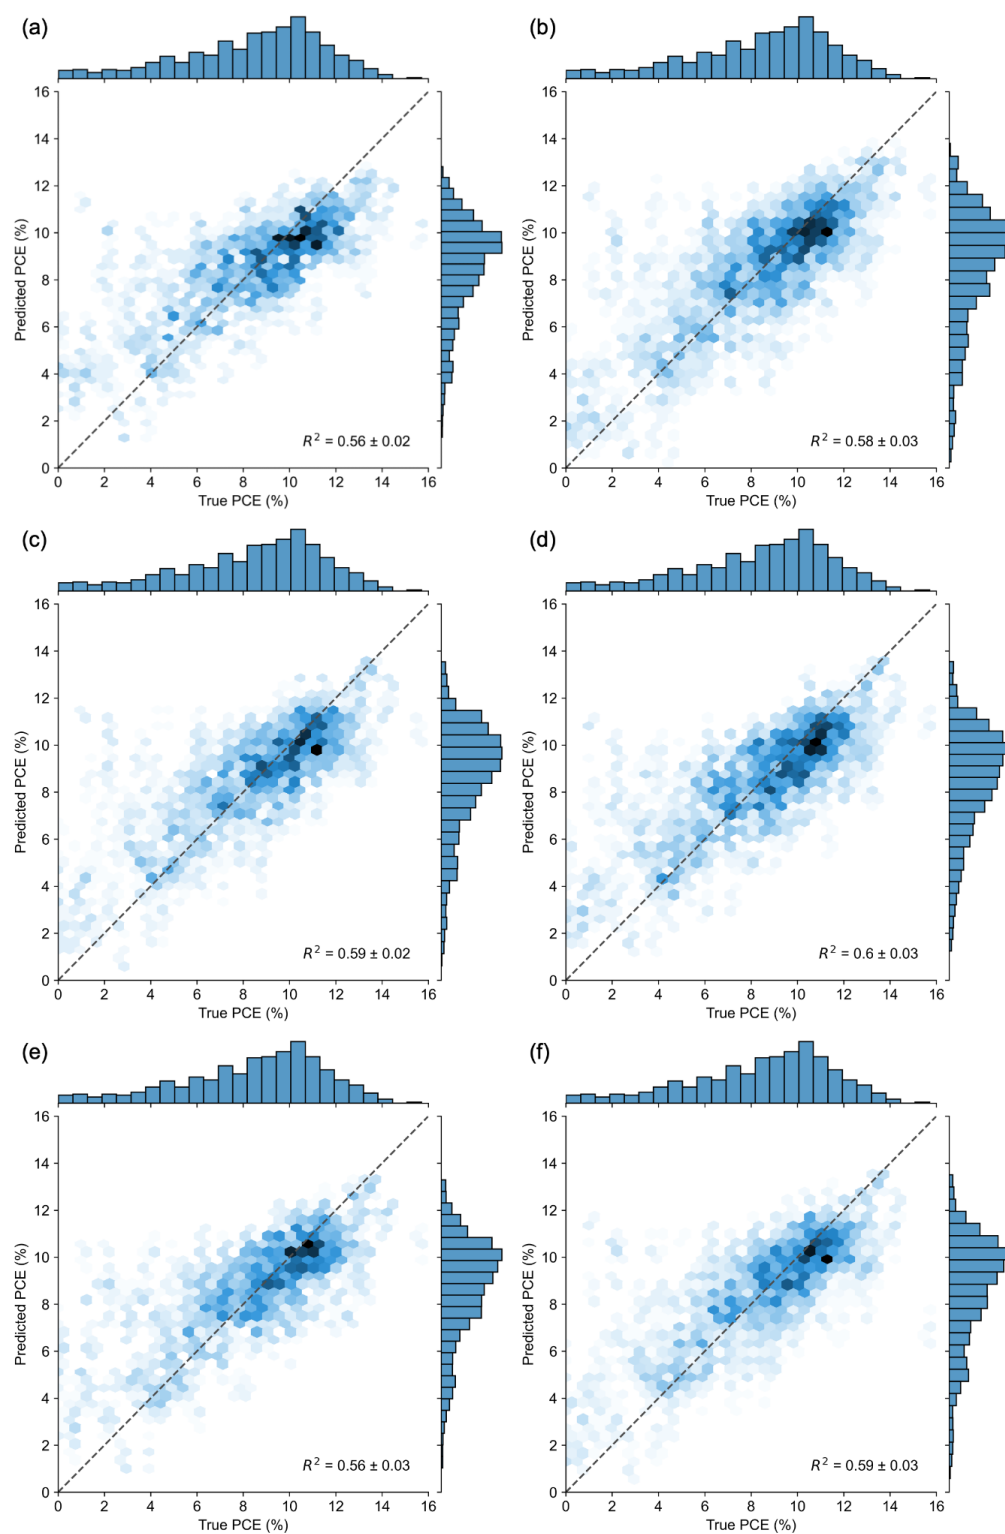

**Figure S10.** Scatter plots of predictions from (a) GP trained on ECFP only, (b) HGB trained on ECFP only, (c) RF trained on ECFP only, (d) RF trained on Mordred descriptors, (e) SVR trained on Mordred descriptors, (f) RF trained on ECFP and material properties.

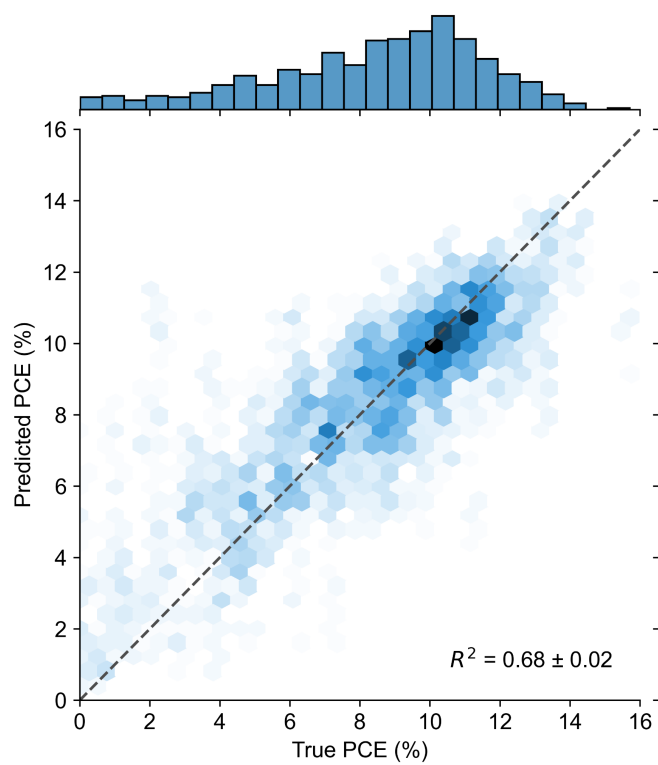

**Figure S11.** HGB trained on Mordred descriptors and log mobilities all subset.

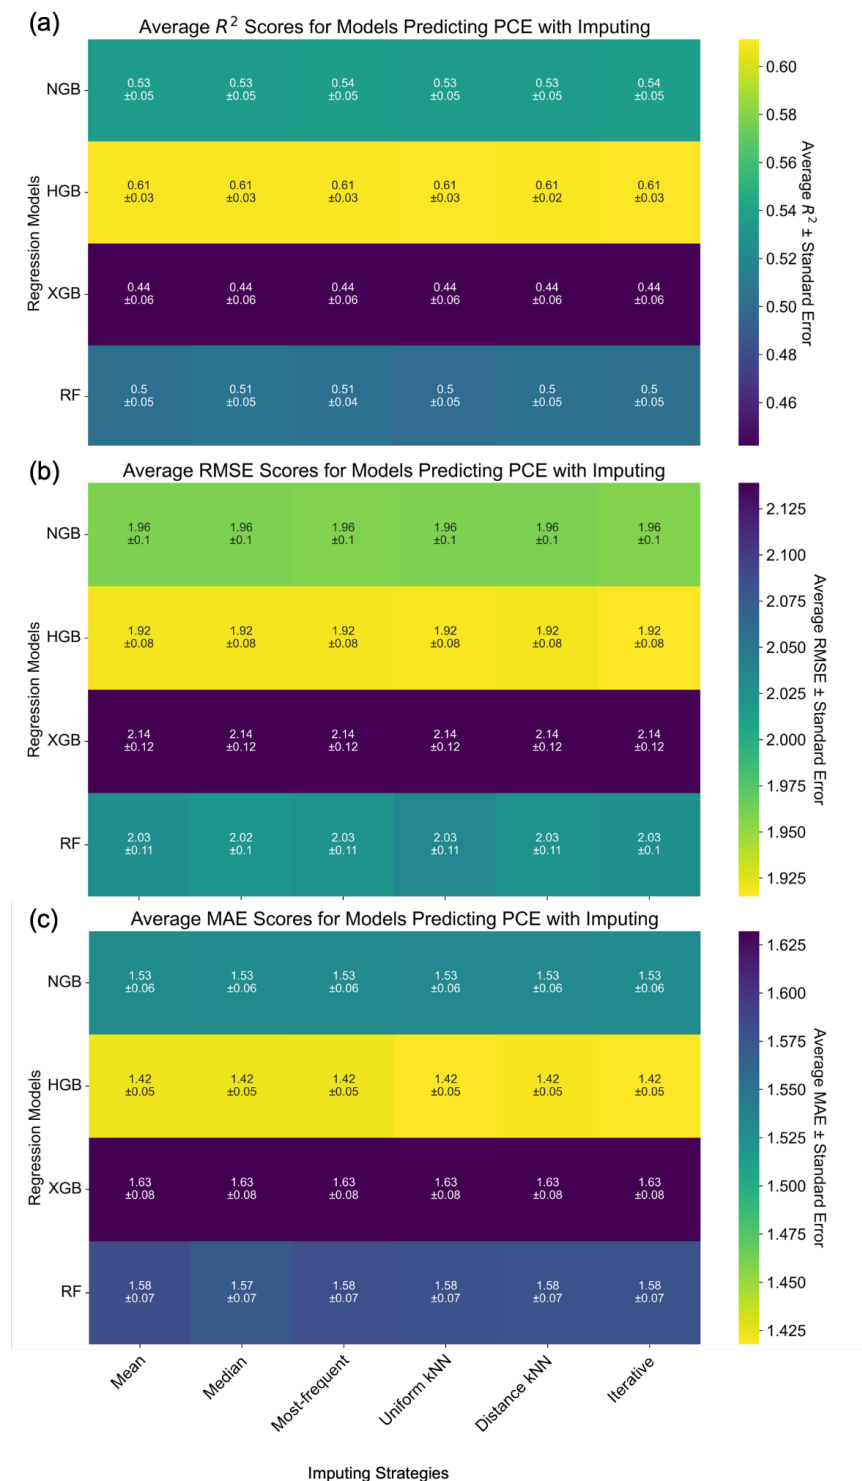

**Figure S12.** Heatmaps of model performance as measured by the (a)  $R^2$ , (b) RMSE, (c) MAE scores for predicting PCE from molecular structure and the device architecture subset of features when imputing missing data using different algorithms. Numbers in each cell correspond to the average score of the model over seven independent five-fold cross-validations  $\pm$  the standard error of the mean.



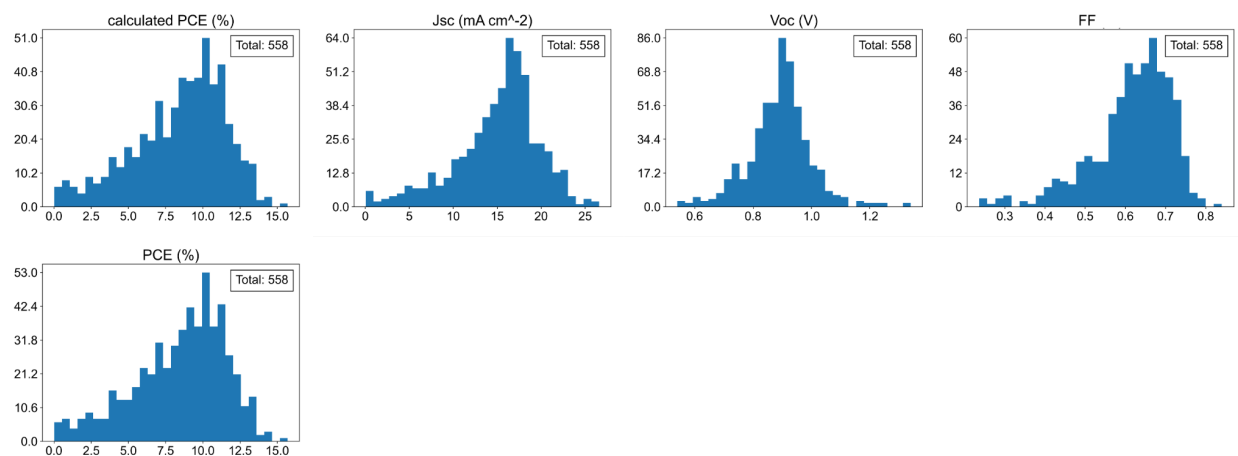

**Figure S13.** Distributions of target values in the dataset.

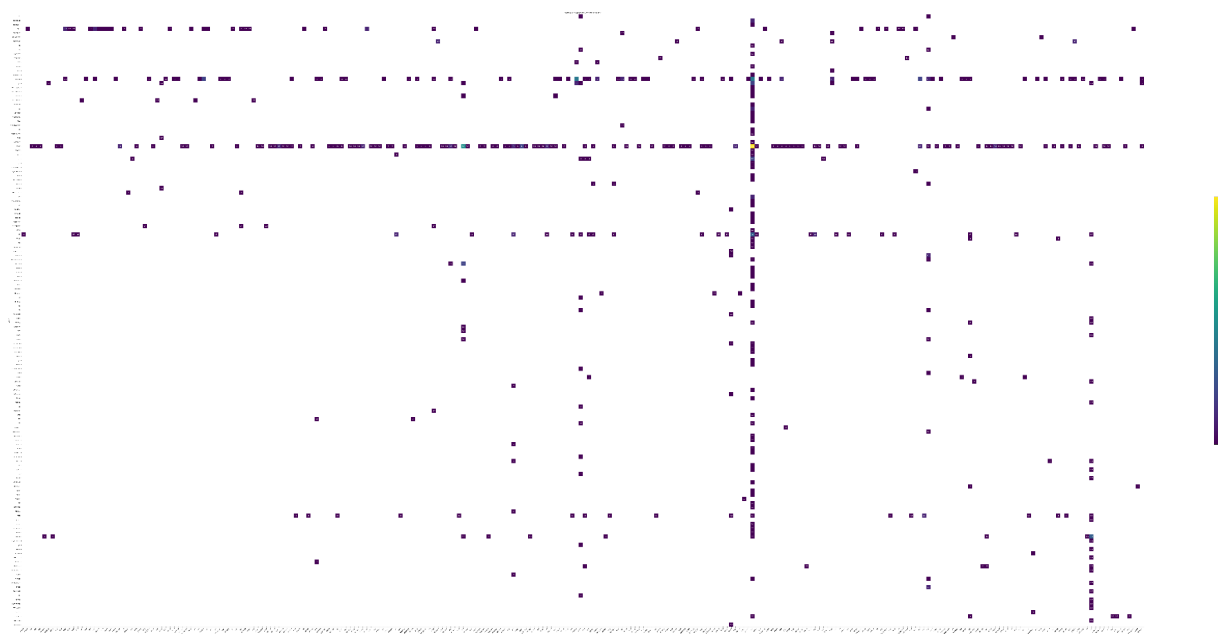

**Figure S14.** D:A heatmap. Most common donors: PTB7-Th, J71, P3HT, PBDB-T. Most common acceptors: ITIC, IT-4F, m-ITIC. X: more positive left, more negative right. Y: more positive top, more negative bottom.



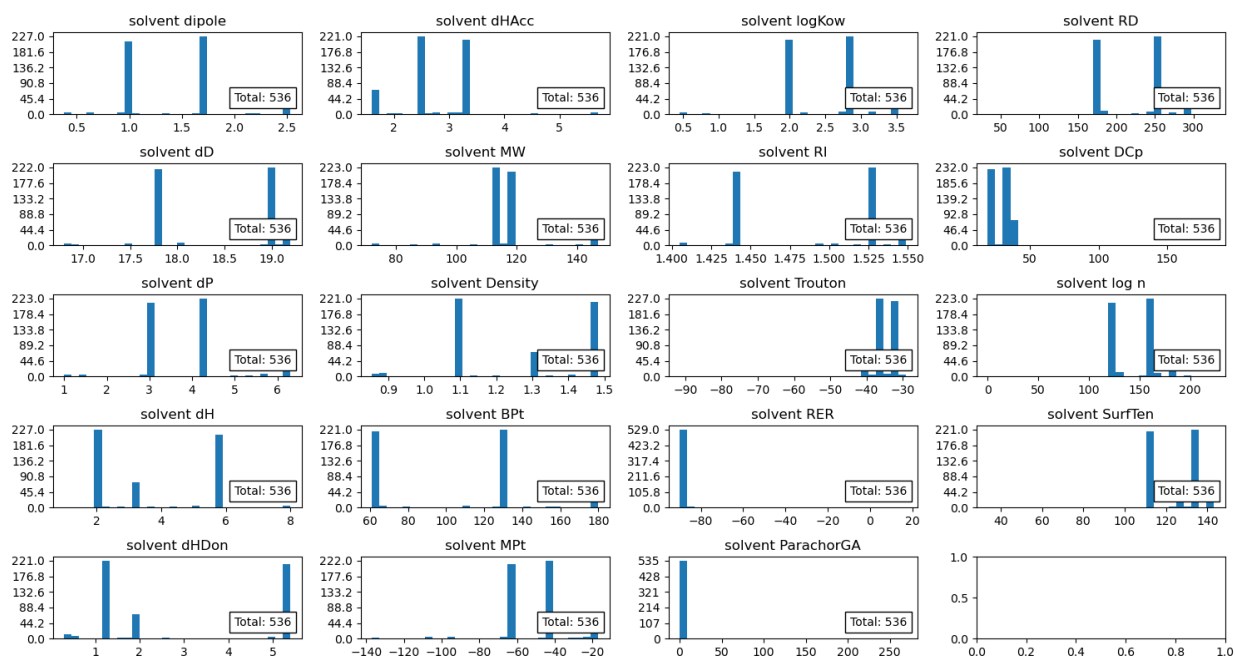

Figure S16. Distributions of solvent descriptor values.

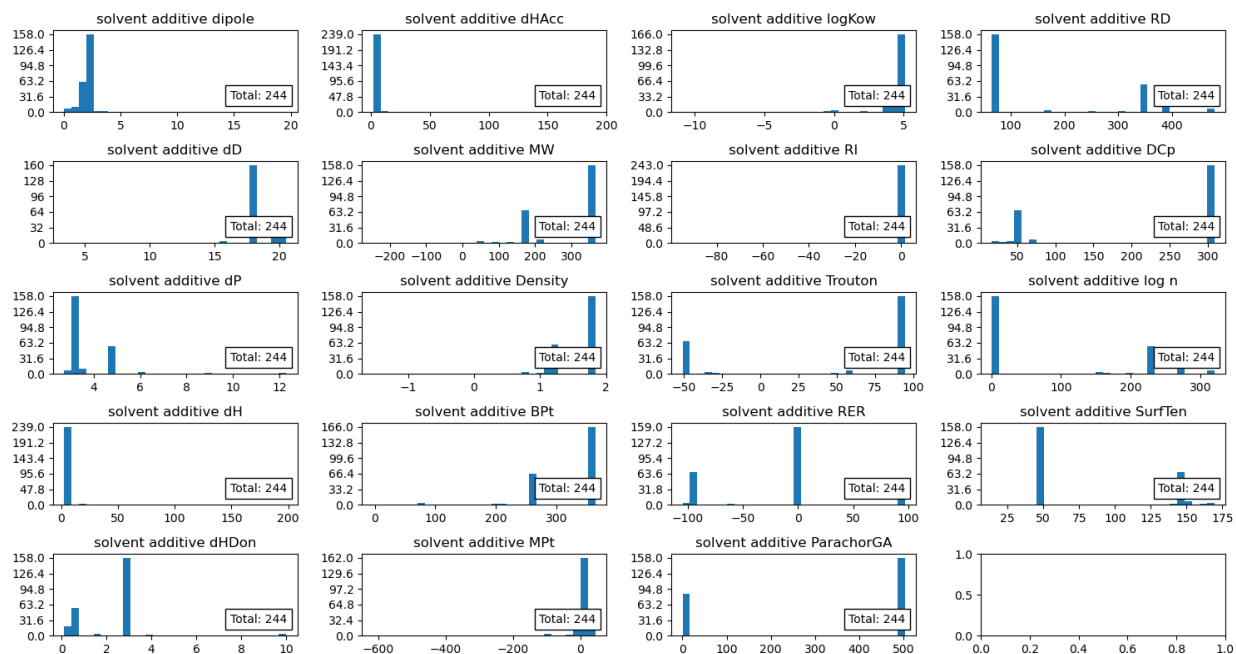

Figure S17. Distributions of solvent additive descriptor values.

**Table S5.** Statistical analysis of feature distributions in the dataset.

| <b>Feature</b>                        | <b>Mean</b> | <b>Std Dev</b> | <b>Median</b> | <b>Mode</b> | <b>Skew</b> | <b>Min</b> | <b>Max</b> | <b>Missing (%)</b> |
|---------------------------------------|-------------|----------------|---------------|-------------|-------------|------------|------------|--------------------|
| Donor PDI                             | 2.15        | 0.72           | 2             | 2           | 4.6         | 1.18       | 8.59       | 63.8               |
| Donor Mn (kDa)                        | 41.21       | 32.79          | 30            | 23.5        | 2.22        | 6.97       | 180.4      | 66.85              |
| Donor Mw (kDa)                        | 89.59       | 73.36          | 63.6          | 50.3        | 2.21        | 13.4       | 364.9      | 81                 |
| HOMO_D (eV)                           | -5.3        | 0.12           | -5.3          | -5.3        | -0.01       | -5.68      | -5.01      | 0                  |
| LUMO_D (eV)                           | -3.4        | 0.2            | -3.43         | -3.43       | 1.11        | -3.75      | -2.78      | 0                  |
| Ehl_D (eV)                            | 1.9         | 0.18           | 1.87          | 1.87        | 1.25        | 1.57       | 2.79       | 0                  |
| Eg_D (eV)                             | 1.79        | 0.13           | 1.77          | 1.77        | -0.17       | 1.48       | 2.12       | 0                  |
| HOMO_A (eV)                           | -5.56       | 0.16           | -5.58         | -5.58       | -0.65       | -6.38      | -5.02      | 0                  |
| LUMO_A (eV)                           | -3.87       | 0.16           | -3.91         | -3.92       | 1.29        | -4.23      | -2.83      | 0                  |
| Ehl_A (eV)                            | 1.69        | 0.19           | 1.66          | 1.66        | 0.89        | 1.1        | 2.61       | 0                  |
| Eg_A (eV)                             | 1.6         | 0.18           | 1.59          | 1.59        | 1.21        | 1.1        | 2.43       | 0                  |
| D:A ratio (m/m)                       | 0.92        | 0.26           | 1             | 1           | 2.04        | 0.33       | 3.33       | 2.51               |
| Active layer spin coating speed (rpm) | 2158.27     | 795.79         | 2000          | 3000        | 0.35        | 600        | 5000       | 52.33              |
| total solids conc. (mg/mL)            | 16.8        | 5.13           | 18            | 20          | 0.16        | 6          | 37.5       | 20.61              |
| solvent additive conc. (% v/v)        | 0.44        | 0.86           | 0             | 0           | 3.18        | 0          | 6          | 1.25               |
| active layer thickness (nm)           | 103.61      | 25.17          | 100           | 100         | 3.77        | 40         | 321        | 25.99              |

| Feature                                                                    | Mean  | Std Dev | Median | Mode  | Skew  | Min   | Max     | Missing (%) |
|----------------------------------------------------------------------------|-------|---------|--------|-------|-------|-------|---------|-------------|
| Annealing temperature (°C)                                                 | 73.01 | 51.6    | 25     | 25    | 0.36  | 25    | 175     | 1.79        |
| Annealing time (min)                                                       | 4.66  | 7.51    | 0      | 0     | 2.92  | 0     | 60      | 10.75       |
| HTL energy level (eV)                                                      | -5.24 | 0.06    | -5.2   | -5.2  | 2.5   | -5.3  | -4.7    | 0.72        |
| HTL thickness (nm)                                                         | 20.63 | 14.04   | 10     | 10    | 0.32  | 3     | 40      | 35.48       |
| ETL energy level (eV)                                                      | -3.73 | 0.83    | -3.9   | -4.46 | 0.85  | -4.65 | -2.14   | 1.25        |
| ETL thickness (nm)                                                         | 18.92 | 11.6    | 20     | 30    | 0.2   | 0.7   | 50      | 54.12       |
| hole mobility blend (cm <sup>2</sup> V <sup>-1</sup> s <sup>-1</sup> )     | 0     | 0       | 0      | 0     | 9.86  | 0     | 0.03    | 18.28       |
| electron mobility blend (cm <sup>2</sup> V <sup>-1</sup> s <sup>-1</sup> ) | 0     | 0       | 0      | 0     | 7.59  | 0     | 0.01    | 17.56       |
| V <sub>oc</sub> (V)                                                        | 0.89  | 0.11    | 0.9    | 0.9   | 0.03  | 0.54  | 1.34    | 0           |
| J <sub>sc</sub> (mAcm <sup>-2</sup> )                                      | 15.07 | 4.74    | 15.96  | 16.8  | -0.76 | 0.05  | 26.6    | 0           |
| FF                                                                         | 0.62  | 0.1     | 0.63   | 0.65  | -1.13 | 0.24  | 0.84    | 0           |
| PCE (%)                                                                    | 8.44  | 3.09    | 9.05   | 6.4   | -0.64 | 0.01  | 15.7    | 0           |
| hole:electron mobility ratio                                               | 33.61 | 440.17  | 1.52   | 2     | 19.67 | 0.01  | 9090.91 | 20.07       |
| log hole mobility blend (cm <sup>2</sup> V <sup>-1</sup> s <sup>-1</sup> ) | -3.79 | 0.76    | -3.7   | -3.82 | -1.13 | -7.36 | -1.57   | 18.28       |
| log electron                                                               | -4.02 | 0.85    | -3.87  | -3.92 | -1.54 | -8.96 | -2.01   | 17.56       |

| Feature                                                           | Mean | Std Dev | Median | Mode | Skew  | Min   | Max   | Missing (%) |
|-------------------------------------------------------------------|------|---------|--------|------|-------|-------|-------|-------------|
| mobility blend (cm <sup>2</sup> V <sup>-1</sup> s <sup>-1</sup> ) |      |         |        |      |       |       |       |             |
| log hole:electron mobility ratio                                  | 0.23 | 0.69    | 0.18   | 0.3  | 0.9   | -2.04 | 3.96  | 20.07       |
| calculated PCE (%)                                                | 8.43 | 3.09    | 9.02   | 4.5  | -0.64 | 0.01  | 15.71 | 0           |

**Table S6.** Performance of HGB models trained on ECFP molecular representations with different radii and numbers of bits.

| Representation | Radius | Bits | R <sup>2</sup> | RMSE      | MAE       |
|----------------|--------|------|----------------|-----------|-----------|
| ECFP6          | 3      | 512  | 0.56±0.02      | 2.05±0.07 | 1.53±0.05 |
| ECFP8          | 4      | 1024 | 0.57±0.03      | 2.02±0.08 | 1.50±0.05 |
| ECFP10         | 5      | 2048 | 0.58±0.03      | 2.00±0.08 | 1.48±0.05 |
| ECFP12         | 6      | 4096 | 0.58±0.03      | 1.99±0.08 | 1.49±0.05 |

## References

- Greenstein, B. L. & Hutchison, G. R. Screening Efficient Tandem Organic Solar Cells with Machine Learning and Genetic Algorithms. *J. Phys. Chem. C* **127**, 6179–6191 (2023).
- Miyake, Y. & Saeki, A. Machine Learning-Assisted Development of Organic Solar Cell Materials: Issues, Analyses, and Outlooks. *J. Phys. Chem. Lett.* **12**, 12391–12401 (2021).
- Li, C.-Z. *et al.* Effective interfacial layer to enhance efficiency of polymer solar cells via solution-processed fullerene-surfactants. *J. Mater. Chem.* **22**, 8574–8578 (2012).
- Allen, T. G. *et al.* Calcium contacts to n-type crystalline silicon solar cells. *Prog. Photovolt. Res. Appl.* **25**, 636–644 (2017).
- Li, X., Liu, X., Zhang, W., Wang, H.-Q. & Fang, J. Fullerene-Free Organic Solar Cells with Efficiency Over 12% Based on EDTA–ZnO Hybrid Cathode Interlayer. *Chem. Mater.* **29**, 4176–4180 (2017).
- Karki, A. *et al.* The role of bulk and interfacial morphology in charge generation, recombination, and extraction in non-fullerene acceptor organic solar cells. *Energy Environ. Sci.* **13**, 3679–3692 (2020).
- Li, W. *et al.* A New Function of N719: N719 Based Solution-Processible Binary Cathode Buffer Layer Enables High-Efficiency Single-Junction Polymer Solar Cells. *Sol. RRL* **1**, 1700014 (2017).
- Zhang, Y., Chen, L., Hu, X., Zhang, L. & Chen, Y. Low Work-function Poly(3,4-ethylenedioxythiophene): Poly(styrene sulfonate) as Electron-transport Layer for High-efficient and Stable Polymer Solar Cells. *Sci. Rep.* **5**, 12839 (2015).
- Huang, F. *et al.* High-Efficiency, Environment-Friendly Electroluminescent Polymers with

Stable High Work Function Metal as a Cathode: Green- and Yellow-Emitting Conjugated Polyfluorene Polyelectrolytes and Their Neutral Precursors. *J. Am. Chem. Soc.* **126**, 9845–9853 (2004).

10. Yang, T. *et al.* Inverted polymer solar cells with 8.4% efficiency by conjugated polyelectrolyte. *Energy Environ. Sci.* **5**, 8208–8214 (2012).
11. Wu, Z. *et al.* n-Type Water/Alcohol-Soluble Naphthalene Diimide-Based Conjugated Polymers for High-Performance Polymer Solar Cells. *J. Am. Chem. Soc.* **138**, 2004–2013 (2016).
12. Yan, Y. *et al.* Light-Soaking-Free Inverted Polymer Solar Cells with an Efficiency of 10.5% by Compositional and Surface Modifications to a Low-Temperature-Processed TiO<sub>2</sub> Electron-Transport Layer. *Adv. Mater.* **29**, 1604044 (2017).
13. Schopp, N. *et al.* Understanding Interfacial Recombination Processes in Narrow-Band-Gap Organic Solar Cells. *ACS Energy Lett.* **7**, 1626–1634 (2022).
14. Tan, Z. *et al.* High performance polymer solar cells with as-prepared zirconium acetylacetonate film as cathode buffer layer. *Sci. Rep.* **4**, 4691 (2014).
15. Montgomery, A. *et al.* Solution-processed copper (I) thiocyanate (CuSCN) for highly efficient CdSe/CdTe thin-film solar cells. *Prog. Photovolt. Res. Appl.* **27**, 665–672 (2019).
16. Li, X., Xie, F., Zhang, S., Hou, J. & Choy, W. C. MoO<sub>x</sub> and V<sub>2</sub>O<sub>x</sub> as hole and electron transport layers through functionalized intercalation in normal and inverted organic optoelectronic devices. *Light Sci. Appl.* **4**, e273–e273 (2015).
17. Chen, S. *et al.* Efficient Nonfullerene Organic Solar Cells with Small Driving Forces for Both Hole and Electron Transfer. *Adv. Mater.* **30**, 1804215 (2018).
18. Abbott, S. HSPiP: Hansen Solubility Parameters in Practice.
